# Supplementary material for: Histamine-bound magnesium porphyrins: diverse coordination modes, inhibitory role in photodegradation of chlorophyll a and antioxidant activity
Source: Royal Society of Chemistry journal article supplement (doi:10.1039/d3dt01309j), 2023-01-01
Supplement: d3dt01309j1.pdf [file d3dt01309j1.pdf]

## SUPPORTING INFORMATION

# Histamine-bound magnesium porphyrins: diverse coordination modes, inhibitory role in photodegradation of chlorophyll *a* and antioxidant activity

Abdul K Choudhury<sup>a</sup>, Rudra Sarkar<sup>b</sup> and Jagannath Bhuyan<sup>a\*</sup>

<sup>a</sup>Department of Chemistry, North Eastern Regional Institute of Science and Technology, Nirjuli, Arunachal Pradesh-791109, India  
e-mail: [jbhuyan7@gmail.com](mailto:jbhuyan7@gmail.com)

<sup>b</sup>Delhi Public School, Ruby Park, Shantipally, Kolkata-700107

**Synthesis of ligand 5,10,15,20-tetrakis-(4-chlorophenyl)porphyrin, H<sub>2</sub>T(4-Cl)PP.** The ligand 5,10,15,20-tetrakis-(4-chlorophenyl)porphyrin, H<sub>2</sub>T(4-Cl)PP was synthesized by refluxing 10.13 g 4-chlorobenzaldehyde (72 mmol) and 5 mL pyrrole (72 mmol) in 250 mL propionic acid following the reported procedure <sup>1</sup>. The yield of the compound was 20%. Molecular Formula: C<sub>44</sub>H<sub>26</sub>Cl<sub>4</sub>N<sub>4</sub>; Molecular Weight: 752.52; UV/Visible bands are at  $\lambda_{\text{max}}$ /nm ( $\epsilon$ /M<sup>-1</sup>cm<sup>-1</sup>) (in CH<sub>2</sub>Cl<sub>2</sub>, 10<sup>-6</sup> M): 418 (584000 Lmol<sup>-1</sup>cm<sup>-1</sup>), 514 (40000 Lmol<sup>-1</sup>cm<sup>-1</sup>), 549 (24000 Lmol<sup>-1</sup>cm<sup>-1</sup>), 589 (19200 Lmol<sup>-1</sup> cm<sup>-1</sup>) and 647 (16800 Lmol<sup>-1</sup>cm<sup>-1</sup>), respectively. Elemental analysis calcd. (%) for C<sub>44</sub>H<sub>26</sub>Cl<sub>4</sub> N<sub>4</sub>: C 70.23, H 3.48, N 7.45; Found: C 70.32, H 3.53, N 7.50.

**Synthesis of ligand 5,10,15,20-tetrakis-(4-bromophenyl)porphyrin, H<sub>2</sub>T(4-Br)PP.** The ligand 5,10,15,20-tetrakis-(4-bromophenyl)porphyrin, H<sub>2</sub>T(4-Br)PP was synthesized by refluxing 13.33 g 4-bromobenzaldehyde (72.06 mmol) and 5 mL pyrrole (72.06 mmol) in 250 mL propionic acid following the reported procedure. Yield: 30%. Molecular Formula: C<sub>44</sub>H<sub>26</sub>Br<sub>4</sub>N<sub>4</sub>; Molecular Weight: 930.32; UV/Vis (in CH<sub>2</sub>Cl<sub>2</sub>, 10<sup>-6</sup> M) λ<sub>max</sub>/nm (ε): 419 (560000 Lmol<sup>-1</sup>cm<sup>-1</sup>), 514 (40000 Lmol<sup>-1</sup>cm<sup>-1</sup>), 549 (24000 Lmol<sup>-1</sup>cm<sup>-1</sup>), 589 (16000 Lmol<sup>-1</sup> cm<sup>-1</sup>) and 646 (11200 Lmol<sup>-1</sup>cm<sup>-1</sup>), respectively. Elemental analysis calcd. (%) for C<sub>44</sub>H<sub>26</sub>Br<sub>4</sub>N<sub>4</sub>: C 56.81, H 2.82, N 6.02; Found: C 56.90, H 2.92, N 6.11.

**Synthesis of 5,10,15,20-tetrakis-(4-bromophenyl)porphyrinato magnesium(II), Mg<sup>II</sup>T(4-Br)PP.** Compound Mg<sup>II</sup>T(4-Br)PP was synthesized following procedure reported for Mg<sup>II</sup>T(4-Cl)PP. Yield: 80%. Molecular Formula: C<sub>44</sub>H<sub>24</sub>Br<sub>4</sub>MgN<sub>4</sub>; Molecular Weight: 952.61; UV/Vis (in CH<sub>2</sub>Cl<sub>2</sub>) λ<sub>max</sub>/nm (ε): 426 (624000 Lmol<sup>-1</sup>cm<sup>-1</sup>), 563 (24000 Lmol<sup>-1</sup>cm<sup>-1</sup>), 603 (16000 Lmol<sup>-1</sup>cm<sup>-1</sup>); Elemental analysis calcd. (%) for C<sub>44</sub>H<sub>24</sub>Br<sub>4</sub>MgN<sub>4</sub>: C 55.48, H 2.54, N 5.88; Found: C 55.59, H 2.64, N 5.97.

**Synthesis of the complex [Mg<sup>II</sup>T(4-Br)PP(hist)] 2.** A sample of Mg<sup>II</sup>T(4-Br)PP (20 mg, 0.02 mmol) was mixed with histamine (5 mg, 0.04 mmol) in 3 mL of chloroform. Crystals were obtained by slow diffusion of n-hexane through the chloroform solution over a period of one week. Molecular Formula: C<sub>49</sub>H<sub>32</sub>Br<sub>4</sub> MgN<sub>7</sub>; Molecular Weight: 1062.73; UV/Vis (in CH<sub>2</sub>Cl<sub>2</sub>) λ<sub>max</sub>/nm (ε): 429 (648000 Lmol<sup>-1</sup>cm<sup>-1</sup>), 567 (32000 Lmol<sup>-1</sup>cm<sup>-1</sup>), 607 (24000 Lmol<sup>-1</sup>cm<sup>-1</sup>); Elemental analysis calcd. (%) for C<sub>49</sub>H<sub>32</sub>Br<sub>4</sub> MgN<sub>7</sub>: C 65.05, H 4.25, N 14.05; Found: C 65.05, H 4.25, N 14.05. IR: Characteristics peaks at 3420, 3097, 2946, 1636, 1511, 1470, 1385, 1328, 1200, 1096, 1066, 996, 795, 746, 723 and 463 cm<sup>-1</sup>. <sup>1</sup>H NMR (400 MHz, CDCl<sub>3</sub>, 298 K): δ(ppm) 8.76 (s, 8H, β-pyrrole), 7.98-8.00 (d, 8H, *o*-H, meso-phenyl), 7.77-7.79 (d, 8H, *m*-H, meso-phenyl), 7.24(s, 1H, CH-imidazole/hist), 6.55 (s, 1H, CH-imidazole/hist), 3.40 (m, 2H, NH-amine/hist), 2.82-2.85 (m, 2H, -CH<sub>2</sub>/hist), 2.53-2.56 (m, 2H, -CH<sub>2</sub>/hist).

**Isolation of chlorophyll *a* from spinach.** Chlorophyll *a* was isolated and purified from spinach leaves following the reported method <sup>2</sup> and the purity was checked by UV-Visible spectroscopy.

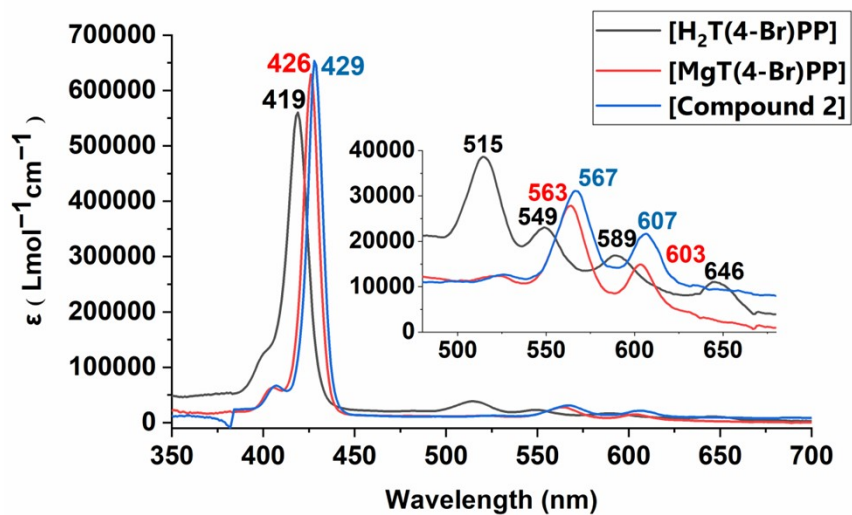

**Figure S1.** UV–Vis absorption spectra of H<sub>2</sub>T(4-Br)PP, [Mg<sup>II</sup>T(4-Br)PP], and **2** in DCM ( $1.25 \times 10^{-6}$  M) at room temperature. The inset shows enlarged views of Q bands.

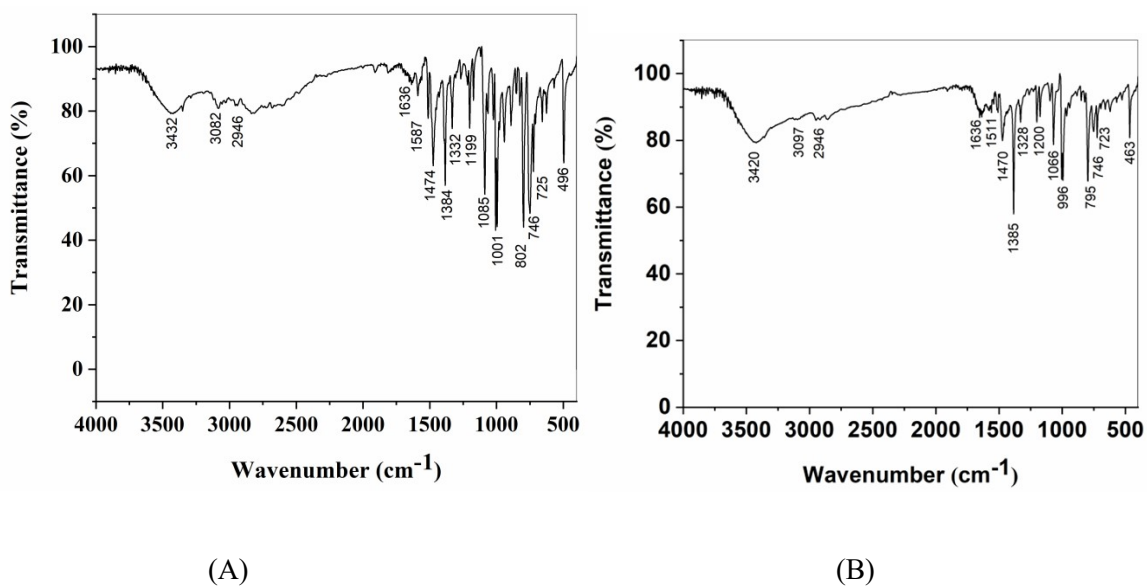

**Figure S2.** IR spectra of A) **1** and B) **2**.

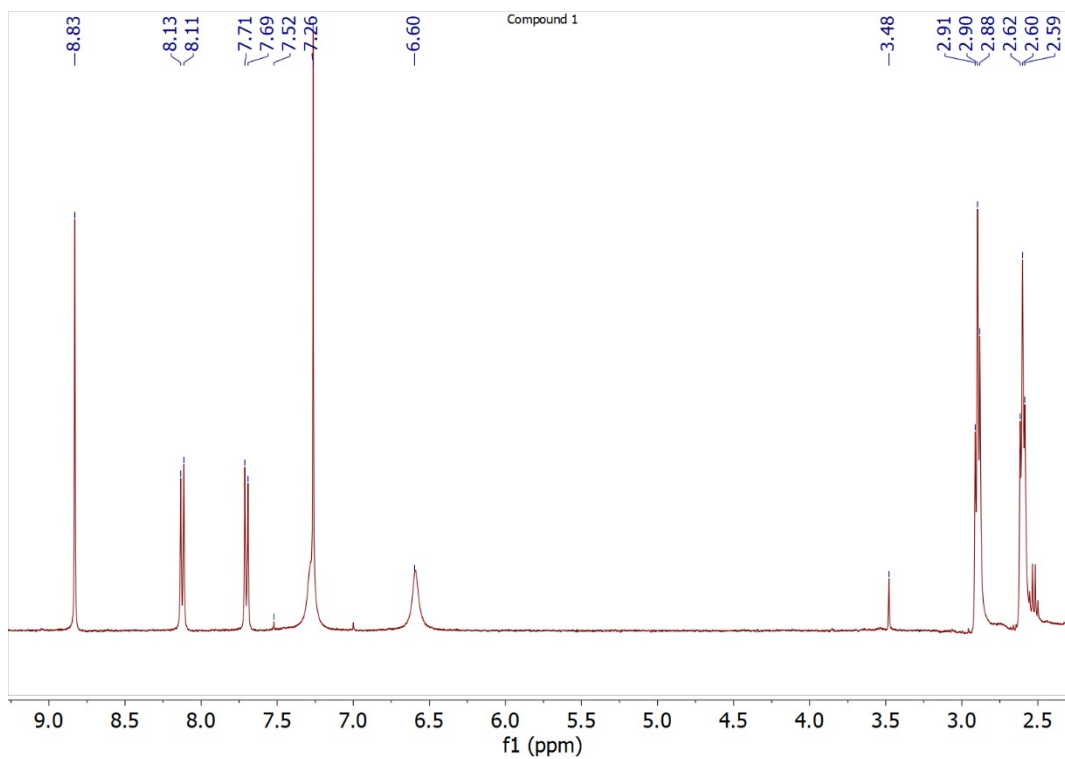

Figure S3:  $^1\text{H}$  NMR spectrum of compound 1.

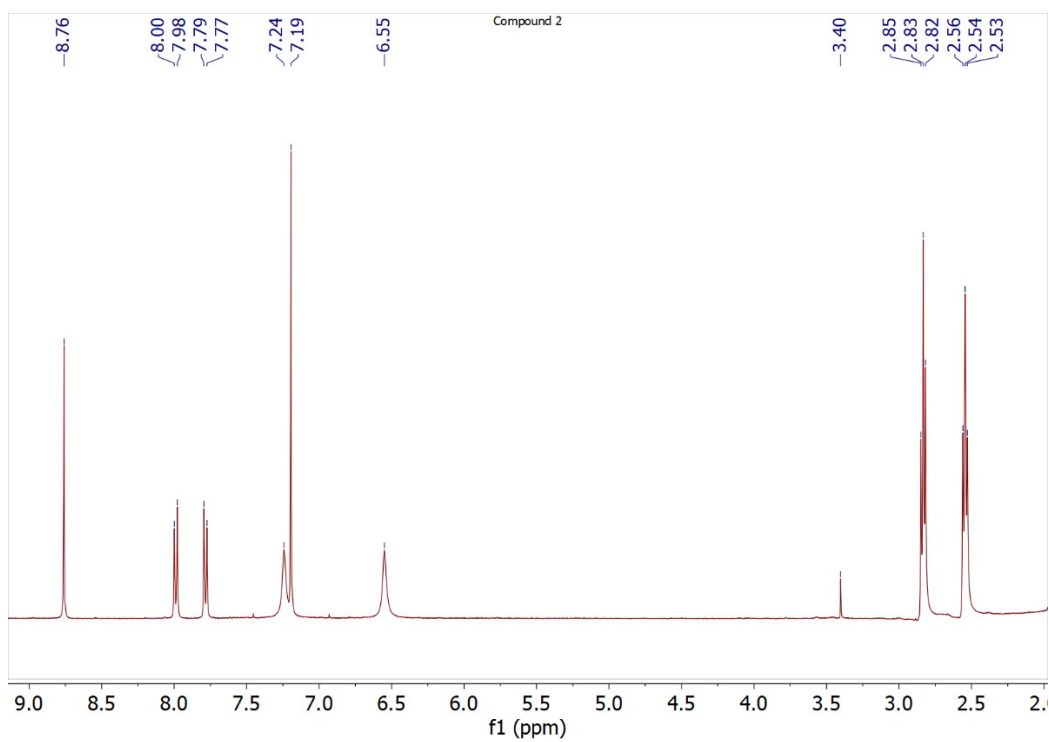

Figure S4:  $^1\text{H}$  NMR spectrum of compound 2.

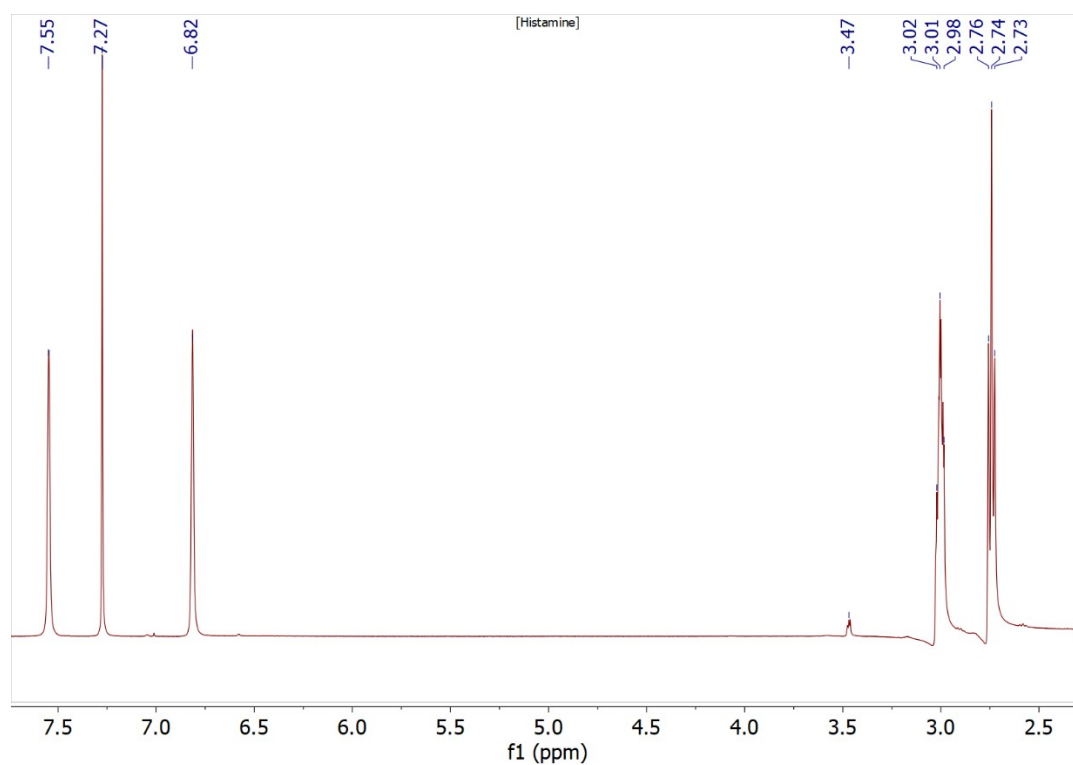

**Figure S5:**  $^1\text{H}$  NMR spectrum of histamine.

**Table S1.** Selected experimental and theoretical (optimized) (i) bond lengths ( $\text{\AA}$ ) and (ii) angles ( $^\circ$ ) of compound **1** and **2**

| (i) Bond lengths( $\text{\AA}$ ) | Crystal structure |            | Optimized structure |            |
|----------------------------------|-------------------|------------|---------------------|------------|
|                                  | Compound 1        | Compound 2 | Compound 1          | Compound 2 |
| Mg–N1                            | 2.079(3)          | 2.076(5)   | 2.096               | 2.102      |
| Mg–N1'                           | 2.079(3)          |            | 2.096               |            |
| Mg–N2                            | 2.080(3)          | 2.106(5)   | 2.095               | 2.102      |
| Mg–N2'                           | 2.080(3)          |            | 2.095               |            |
| Mg–N3                            | 2.300(3)          | 2.088(5)   | 2.313               | 2.109      |
| Mg–N3'                           | 2.300(3)          |            | 2.313               |            |
| Mg–N4                            |                   | 2.089(5)   |                     | 2.110      |
| Mg–N5                            |                   | 2.145(5)   |                     | 2.221      |

| (ii)Angles (°)<br>Compound 2 | <u>Crystal structure</u> |            | <u>Optimized structure</u> |            |
|------------------------------|--------------------------|------------|----------------------------|------------|
|                              | Compound 1               | Compound 2 | Compound 2                 | Compound 1 |
| N3–Mg–N3'                    | 180.00(15)               |            | 180.00                     |            |
| N1–Mg–N1'                    | 180.00(1)                |            | 180.00                     |            |
| N2–Mg–N2'                    | 180.00(1)                |            | 180.00                     |            |
| N1–Mg–N3                     | 89.06(11)                | 158.5(2)   | 89.69                      | 159.46     |
| N1'–Mg–N3                    | 90.93(11)                |            | 90.30                      |            |
| N1–Mg–N3'                    | 90.94(11)                |            | 90.30                      |            |
| N1'–Mg–N3'                   | 89.06(11)                |            | 89.69                      |            |
| N2–Mg–N3                     | 89.84(11)                |            | 85.48                      |            |
| N2'–Mg–N3                    | 90.16(11)                |            | 94.52                      |            |
| N2–Mg–N3'                    | 90.16(11)                |            | 94.52                      |            |
| N2'–Mg–N3'                   | 89.84(11)                |            | 85.48                      |            |
| N1–Mg–N2                     | 89.80(11)                | 87.9(2)    | 89.69                      | 87.95      |
| N1–Mg–N2'                    | 90.20(11)                |            | 90.31                      |            |
| N1'–Mg–N2                    | 90.20(11)                |            | 90.31                      |            |
| N1'–Mg–N2'                   | 89.80(11)                |            | 89.69                      |            |
| N1–Mg–N4                     |                          | 87.8(2)    |                            | 88.33      |
| N1–Mg–N5                     |                          | 105.2(2)   |                            | 102.95     |
| N2–Mg–N5                     |                          | 105.4(2)   |                            | 106.54     |
| N3–Mg–N5                     |                          | 96.2(2)    |                            | 97.48      |
| N4–Mg–N5                     |                          | 99.4(2)    |                            | 95.63      |

**Table S2.** Selected (i) bond lengths (Å) and (ii) bond angles (°) for [Mg<sup>II</sup>T(4-Cl)PP(Hist)<sub>2</sub>] **1**, [Mg<sup>II</sup>T(4-Br)PP(hist)] **2** and several related complexes

| (i) Complex                                              | M—N <sub>p</sub> <sup>a</sup> | M--X <sub>L</sub> <sup>b</sup> | M--P <sub>C</sub> <sup>c</sup> | Ref.      |
|----------------------------------------------------------|-------------------------------|--------------------------------|--------------------------------|-----------|
| Pentacoordinated Magnesium(II)                           |                               |                                |                                |           |
| porphyrins                                               |                               |                                |                                |           |
| [MgT(4-Br)PP(Hist)]                                      | 2.090(5)                      | 2.145(5)                       | 0.421                          | this work |
| [Mg(TPP)(H <sub>2</sub> O)] <sup>d</sup>                 | 2.092(7)                      | 2.012 (6)                      | 0.460                          | [3]       |
| [MgT(4-Cl)PP(DMAP)] <sup>e</sup>                         | 2.082 (3)                     | 2.130 (4)                      | 0.3709                         | [4]       |
| [Mg(TBPB)(4,4'-bpy) <sub>2</sub> ] <sup>f,g</sup>        | 2.065 (2)                     | 2.319-2.290                    | 0.072                          | [5]       |
| Hexacoordinated Magnesium(II)                            |                               |                                |                                |           |
| porphyrins                                               |                               |                                |                                |           |
| [MgT(4-Cl)PP(Hist) <sub>2</sub> ]                        | 2.079(3)                      | 2.300(3)                       | 0.000                          | this work |
| [Mg(TBrPP)(H <sub>2</sub> O) <sub>2</sub> ] <sup>h</sup> | 2.069                         | 2.221                          | 0.000                          | [6]       |
| [Mg(TPP)(H <sub>2</sub> O) <sub>2</sub> ] <sup>d</sup>   | 2.071                         | 2.213                          | 0.000                          | [7]       |
| [Mg(TPP)(py) <sub>2</sub> ] <sup>d,i</sup>               | 2.072                         | 2.376                          | 0.000                          | [8]       |
| [Mg(TPP)(HMTA) <sub>2</sub> ] <sup>d,j</sup>             | 2.067(5)                      | 2.473(2)                       | 0.000                          | [9]       |

| (ii) Complex                                      | Bond angles (°)               | Ref.      |
|---------------------------------------------------|-------------------------------|-----------|
| [MgT(4-Br)PP(Hist)]                               | 105.2 (N1(por)-Mg-N5(axial))  | This work |
| [Mg(TPP)(H <sub>2</sub> O)] <sup>d</sup>          | 97.6 (N(por)-Mg-O(axial))     | 3         |
| [MgT(4-Cl)PP(DMAP)] <sup>e</sup>                  | 98.36 (N1(por)-Mg-N(axial))   | 4         |
| [Mg(TBPB)(4,4'-bpy) <sub>2</sub> ] <sup>f,g</sup> | 88.30 (N1(por)-Mg-N3(axial))  | 5         |
|                                                   | 91.70 (N1(por)-Mg-N4(axial))  |           |
| [MgT(4-Cl)PP(Hist) <sub>2</sub> ]                 | 89.06 (N1(por)-Mg-N3(axial))  | This work |
|                                                   | 90.94 (N1(por)-Mg-N3'(axial)) |           |
| [Mg(TPP)(py) <sub>2</sub> ] <sup>d,i</sup>        | 94.07 (N(por)-Mg-N(axial))    | 8         |
| [Mg(TPP)(HMTA) <sub>2</sub> ] <sup>d,j</sup>      | 90.21 (N1(por)-Mg-N3(axial))  | 9         |

- 
- <sup>a</sup>M-N<sub>p</sub> = average equatorial metal-nitrogen pyrrole distance
- <sup>b</sup>M-X<sub>L</sub> = metal-axial ligand distance
- <sup>c</sup>M-P<sub>C</sub> = distance between the metal atom and the mean plane made by the 24-atom core of the porphyrin (PC)
- d: *meso*-tetraphenylporphyrin
- e: DMAP: [4-(dimethylamino)pyridine]
- f: TPBP = *meso*-tetrakis(4-bromophenyl)porphyrinato
- g: 4,4'-bpy = 4,4-bipyridine
- h: TBrPP = *meso*-tetrakis(4-bromophenyl)porphyrinato
- i: py = pyridine
- j: HTMA = hexamethylenetetramine

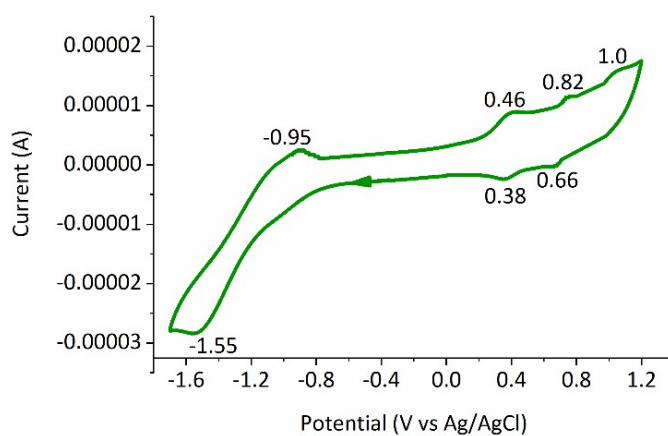

**Figure S6.** Cyclic voltammogram of compound 1 ( $10^{-3}$  M) in dry DCM with scan rate 0.1 V/s.



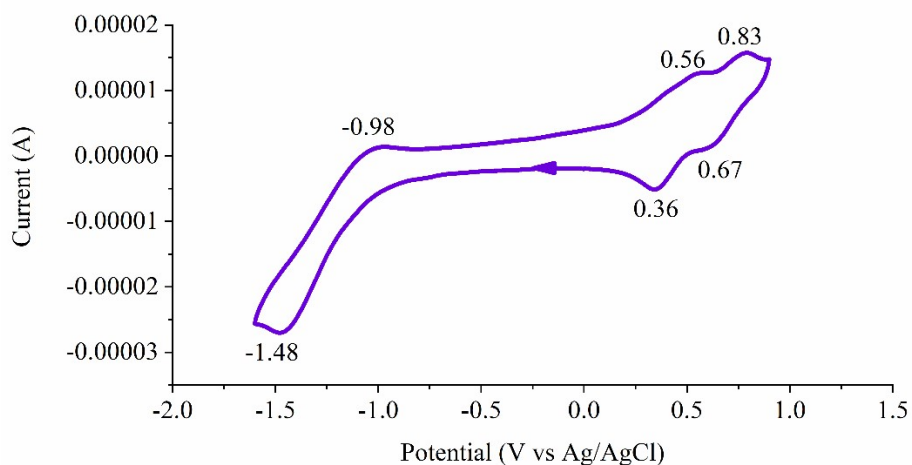

**Figure S7.** Cyclic voltammogram of [MgT(4-Cl)PP] ( $10^{-3}$  M) in dry DCM with scan rate 0.1 V/s.

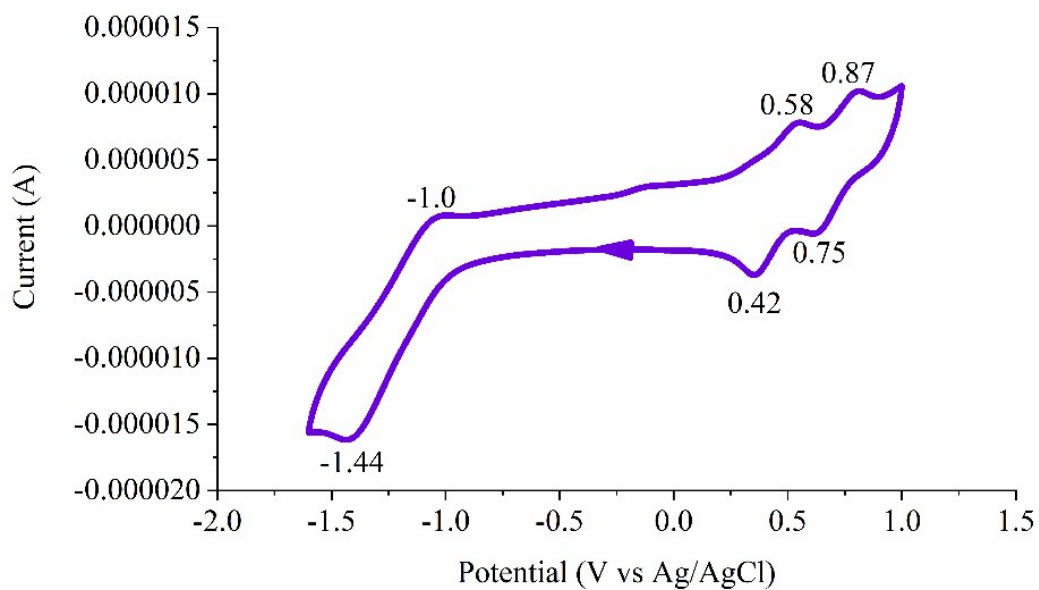

**Figure S8.** Cyclic voltammogram of [MgT(4-Br)PP] ( $10^{-3}$  M) in dry DCM with scan rate 0.1 V/s.

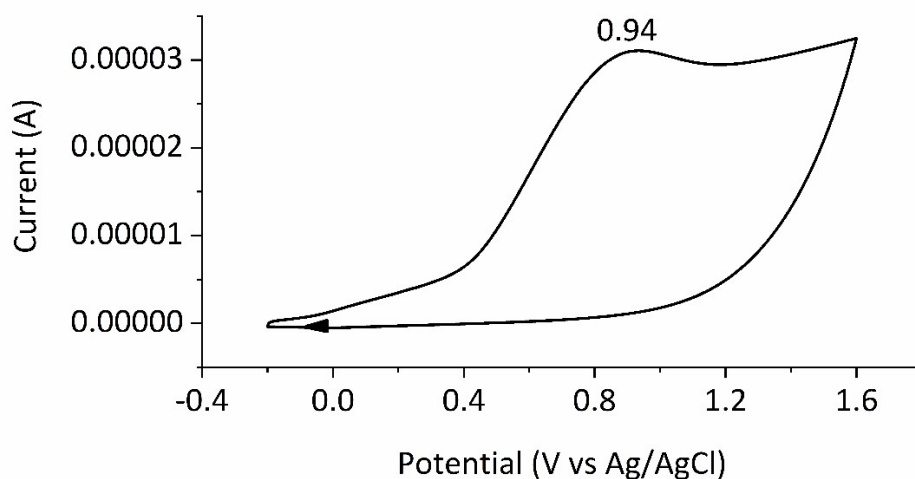

**Figure S9.** Cyclic voltammogram of histamine ( $10^{-3}$  M) in dry DCM with scan rate 0.1 V/s.

**Table S3.** Comparison of antioxidant activities of reported Mg-porphyrins

| Mg-porphyrin complexes            | Antioxidant activity (100 $\mu\text{g/mL}$ )<br>% | Reference |
|-----------------------------------|---------------------------------------------------|-----------|
| [Mg(TBrPP)(4,4' -bpy)]            | 60                                                | 10        |
| [Mg(TBrPP)(pyz) <sub>2</sub> ]    | 40                                                | 10        |
| [Mg(TCIPP)]                       | 30                                                | 4         |
| [Mg(TCIPP)(DMAP)]                 | 51                                                | 4         |
| [MgTPP]                           | 70.99                                             | 11        |
| [MgTPP(DMF)]                      | 75.57                                             | 11        |
| [MgT(4-Cl)PP(Hist) <sub>2</sub> ] | 92.45                                             | This work |
| [MgT(4-Br)PP(Hist)]               | 86.88                                             | This work |

4,4'-bpy = 4,4'-bipyridine

pyz = pyrazine

DMAP = 4-(dimethylamino)pyridine)

DMF= Dimethylformamide

**Table S4.** Electronic transitions of compound **2** calculated in dichloromethane using the TD-DFT method.

| Most important orbital excitations         | Theoretical $\lambda_{\max}$ | f      | Experimental $\lambda_{\max}$ ( $\epsilon$ ) |
|--------------------------------------------|------------------------------|--------|----------------------------------------------|
| H-1 $\rightarrow$ L+1, H $\rightarrow$ L   | 566                          | 0.0587 | 607 (24000)                                  |
| H-1 $\rightarrow$ L, H $\rightarrow$ L+1   | 562                          | 0.0421 | 566 (32000)                                  |
| H-2 $\rightarrow$ L, H-2 $\rightarrow$ L+1 | 420                          | 0.008  | 429 (648000)                                 |

$\lambda$  : wavelength (nm);  $\epsilon$ : molar absorption coefficient ( $\text{dm}^3 \text{mol}^{-1} \text{cm}^{-1}$ ); f : oscillator strength; H : highest occupied molecular orbital(HOMO); L : lowest unoccupied molecular orbital(LUMO).

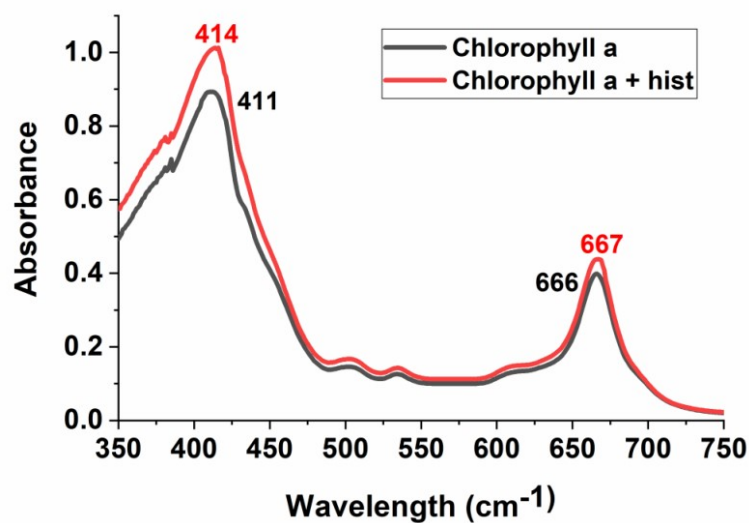

**Figure S10.** Electronic spectra of chlorophyll *a* ( $10^{-5}$  M in DCM) and chlorophyll *a* in the presence of histamine ( $10^{-4}$  M in DCM).

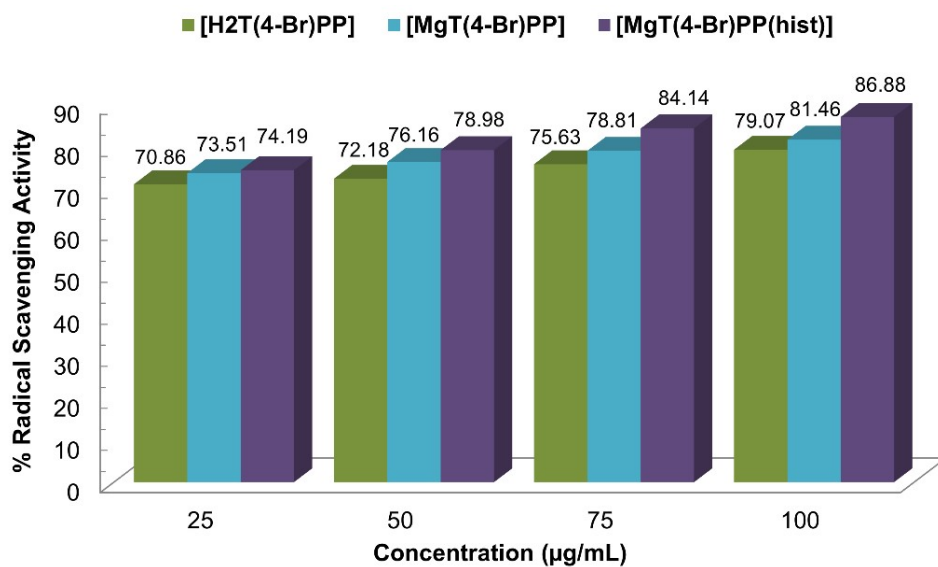

**Figure S11.** DPPH radical scavenging activity of H<sub>2</sub>T(4-Br)PP, [Mg<sup>II</sup>T(4-Br)PP], and **2** at different concentrations.

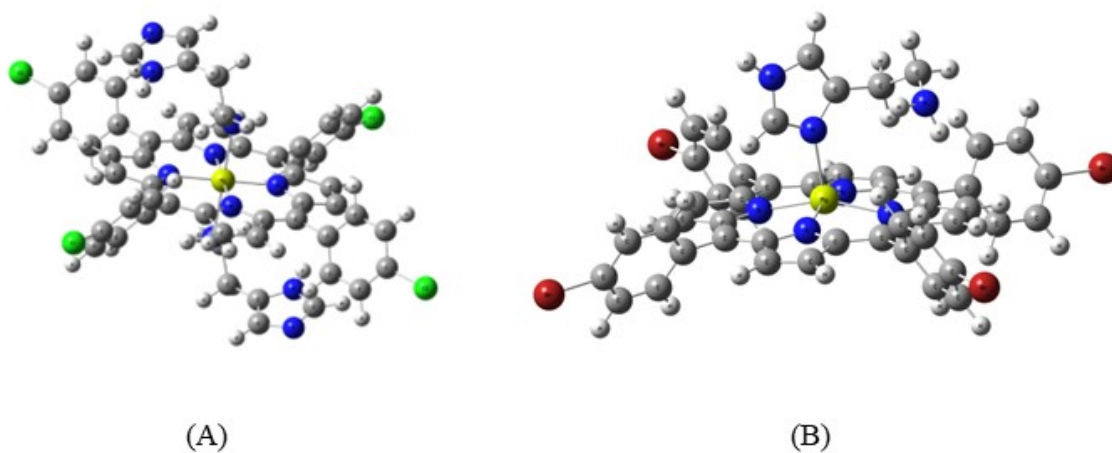

**Figure S12.** Optimized molecular structure of A) compound **1** and B) compound **2**.

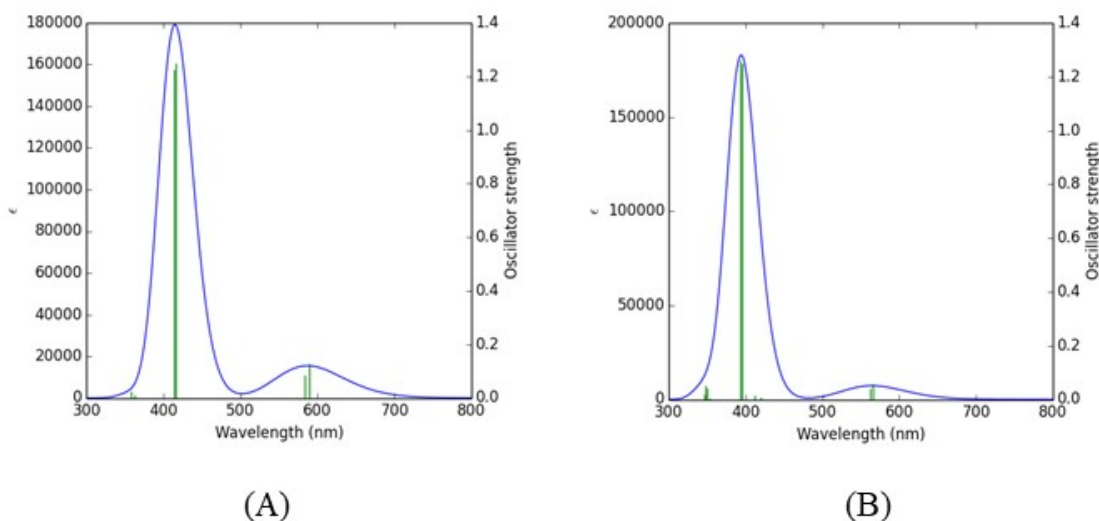

**Figure S13.** The simulated electronic spectrum of A) compound **1** and B) **2** obtained from theoretical calculation.

#### REFERENCES:

- 1 A. D. Adler, F. R. Longo, J. D. Finarelli, J. F. Goldmacher, J. M. Assour, and L. Korsakoff, A simplified synthesis for meso-tetraphenylporphine, *Journal of Organic Chemistry*, 1967, **32**, 476-476.
- 2 S. M. Diehl-Jones, Chlorophyll separation and spectral identification, *J. Chem. Ed.*, 1984, **61**, 454-456.
- 3 O. Chin Choon, V. Mckee, and G. A. Rodley, The Crystal and Molecular Structure of a Monohydrated Dipicoline Magnesium Tetraphenylporphyrin Complex, *Inorganica Chimic Acta*, 1986, **123**, L11-L14 L11.
- 4 T. Fradi, O. Nouredine, F. ben. Taheur, M. Guergueb, S. Nasri, N. Amiri, A. Almahri, T. Roisnel, V. Guerineau, N. Issoui and H. Nasri, New DMAP meso-arylporphyrinMagnesium(II) complex. Spectroscopic, Cyclic voltammetry and X-ray molecular structure characterization. DFT, DOS and MEP calculations and Antioxidant and Antifungal activities, *Journal of Molecular Structure*, 2021, 1236.
- 5 N. Amiri, M. Hajji, T. Roisnel, G. Simonneaux, H. Nasri and M. Hajji, Synthesis, molecular structure, photophysical properties and spectroscopic characterization of new 1D-magnesium(II) porphyrin-based coordination polymer, *Res Chem Intermed.*, 2018, **44**, 5583–5595.

- 6 N. Amiri, S. Nasri, T. Roisnel, G. Simonneaux, H. Nasri and M. Weil, Crystal structure of diaqua[5,10,15,20-tetrakis(4-bromophenyl)porphyrinato- $\kappa$ 4N]magnesium, *Acta Crystallographica Section E: Structure Reports Online*, 2015, **71**(3), 73–74.
- 7 K. Ezzayani, M. S. Belkhiria, S. Najmudin, C. Bonifácio and H. Nasri, Aqua(4-cyanopyridine- $\kappa$ N4)(5,10,15,20-tetraphenylporphyrinato $\kappa$ 4N)magnesium, *Acta Crystallographica Section E: Structure Reports Online*, 2013, **69**(1).
- 8 M. P. Bym, C. J. Curtis, Y. Hsiou, I. Khan, P. A. Sawin, S. K. Tendick, A. Terzis and C. E. Strouse, Porphyrin Sponges: Conservation of Host Structure in over 200 Porphyrin-Based Lattice Clathrates, *J. Am. Chem. Soc.*, 1993, **115**, 9480-9491.
- 9 K. Ezzayani, A. ben Khelifa, E. Saint-Aman, F. Loiseau and H. Nasri, Complex of hexamethylenetetramine with magnesium-tetraphenylporphyrin: Synthesis, structure, spectroscopic characterizations and electrochemical properties, *Journal of Molecular Structure*, 2017, **1137**, 412–418.
- 10 N. Amiri, F. ben Taheur, S. Chevreux, C.M. Rodrigues, V. Dorcet, G. Lemercier, and H. Nasri, Syntheses, crystal structures, photo-physical properties, antioxidant and antifungal activities of Mg(II)4,4'-bipyridine and Mg(II) pyrazine complexes of the 5,10,15,20-tetrakis(4-bromophenyl)porphyrin, *Inorganica Chimica Acta*, 2021, **525**.
- 11 A. K. Choudhury, B. P. Borah, K. D. Borah and J. Bhuvan, Synthesis, crystal structure, computational studies, and antioxidant properties of dimethylformamide-bound magnesium tetraphenylporphyrin, *Journal of Coordination Chemistry*, 2023, DOI: [10.1080/00958972.2023.2222876](https://doi.org/10.1080/00958972.2023.2222876).

## Comments of Checkcif

### Alert level of compound 1

PLAT430\_ALERT\_2\_B Short Inter D...A Contact N4 ..N4 . 2.85 Ang.  
-x,1-y,2-z = 2\_567 Check

**Response: The short N-N bond distance is due to the H-bonding interaction present in the structure.**

PLAT430\_ALERT\_2\_B Short Inter D...A Contact N5 ..N5 . 2.86 Ang.  
1-x,1-y,2-z = 2\_667 Check

**Response: The short N-N bond distance is due to the H-bonding interaction present in the structure.**

PLAT934\_ALERT\_3\_B Number of (Iobs-Icalc)/Sigma(W) > 10 Outliers .. 3 Check

**Response: The variation is due to the reason that checkcif does the calculation in a different way than SHELXL. This is not really an issue.**

PLAT990\_ALERT\_1\_B Deprecated .res/.hkl Input Style SQUEEZE Job ... ! Note

**The above B alert is due to disorders in the lattice solvent molecules. We have refined the data with the squeeze command by PLATON software. The alert level B arises due to the disorders in the crystal.**

Alert level B of compound 2

PLAT353\_ALERT\_3\_B Long N-H (N0.87,N1.01A) N7 - H7B . 1.08 Ang.

**Response:**

**The N7 atom participates in a strong H-bonding with the imidazole/histamine ring nitrogen. This relatively long N7-H7B bond is due to H-bonding which is discussed in the paper.**

PLAT971\_ALERT\_2\_B Check Calcd Resid. Dens. 0.97Ang From C49 3.03 eA-3

**Response: The above B alert is due to disorders in the lattice solvent molecules.**

PLAT971\_ALERT\_2\_B Check Calcd Resid. Dens. 0.97Ang From C49 2.86 eA-3

**Response: The above B alert is due to disorders in the lattice solvent molecules.**

PLAT990\_ALERT\_1\_B Deprecated .res/.hkl Input Style SQUEEZE Job ... ! Note

**Response: The above B alert is due to disorders in the lattice solvent molecules. We have refined the data with the squeeze command by PLATON software. The alert level B arises due to the disorders in the crystal.**
